# Supplementary material for: A Digital Game and School-Based Intervention for Students in Hong Kong: Quasi-Experimental Design
Source: PubMed Central journal article supplement (PMC6473212; doi:10.2196/12003), 2019-04-05
Supplement: jmir_v21i4e12003_app1.pdf [file jmir_v21i4e12003_app1.pdf]

Table 2

|                           |       |     | Control ("Ctrl") |        |        | Intervention ("Intv") |        |        | Beta coefficients    |                   |                     |
|---------------------------|-------|-----|------------------|--------|--------|-----------------------|--------|--------|----------------------|-------------------|---------------------|
| Outcome Measures          | Range | N   | T0               | T1     | T2     | T0                    | T1     | T2     | Baseline differences | T1*Intv (p-value) | T2*Intv (p-value)   |
| <b>Knowledge</b>          | 0-11  | 397 | 7.73             | 7.67   | 7.95   | 7.52                  | 7.95   | 8.36   | -0.16                | 0.46 <sup>a</sup> | 0.66 <sup>aaa</sup> |
|                           |       |     | (1.00)           | (1.26) | (1.26) | (1.34)                | (1.26) | (1.30) |                      | P=.01             | P<.001              |
| <b>Anxiety</b>            | 0-18  | 396 | 7.05             | 6.33   | 6.57   | 6.15                  | 5.95   | 6.49   | -0.72                | 0.53              | 1.00                |
|                           |       |     | (4.41)           | (4.07) | (4.18) | (4.13)                | (4.20) | (4.15) |                      | P=.28             | P=.07               |
| <b>Thoughts</b>           |       |     |                  |        |        |                       |        |        |                      |                   |                     |
| <b>Negative</b>           | 0-40  | 396 | 12.25            | 11.34  | 11.17  | 11.93                 | 10.41  | 10.31  | -0.10                | -0.37             | 0.33                |
|                           |       |     | (7.44)           | (7.67) | (7.47) | (8.13)                | (7.67) | (7.75) |                      | P=.66             | P=.71               |
| <b>Positive</b>           | 0-40  | 396 | 20.75            | 21.82  | 23.00  | 23.04                 | 23.60  | 23.46  | 2.41*                | 0.00              | -1.54               |
|                           |       |     | (7.46)           | (8.14) | (7.22) | (8.26)                | (7.36) | (7.62) |                      | P>.99             | P=.13               |
| <b>Perspective-taking</b> | 0-24  | 391 | 16.74            | 15.72  | 15.17  | 16.63                 | 16.74  | 16.70  | -0.07                | 1.03              | 1.50 <sup>a</sup>   |
|                           |       |     | (4.79)           | (4.36) | (3.89) | (5.33)                | (4.52) | (4.30) |                      | P=.08             | P=.03               |
| <b>Self-esteem</b>        | 10-40 | 391 | 27.99            | 28.87  | 29.10  | 28.79                 | 29.15  | 29.43  | 0.79                 | -0.56             | -0.91               |
|                           |       |     | (5.61)           | (4.80) | (4.95) | (4.79)                | (5.00) | (5.43) |                      | P=.29             | P=.15               |

<sup>a</sup>p < .05; <sup>aa</sup>p < .01; <sup>aaa</sup>p < .001
