# Supplementary material for: A Digital Game and School-Based Intervention for Students in Hong Kong: Quasi-Experimental Design
Source: PubMed Central journal article supplement (PMC6473212; doi:10.2196/12003), 2019-04-05
Supplement: jmir_v21i4e12003_app2.pdf [file jmir_v21i4e12003_app2.pdf]

Table 3

|                           |       |     | Completion rate below 50%<br>(low) |        |        | Completion rate above 50%<br>(high) |        |        | Beta coefficients    |                          |                          |
|---------------------------|-------|-----|------------------------------------|--------|--------|-------------------------------------|--------|--------|----------------------|--------------------------|--------------------------|
| Outcome Measures          | Range | N   | T0                                 | T1     | T2     | T0                                  | T1     | T2     | Baseline differences | T1*<br>High<br>(p-value) | T2*<br>High<br>(p-value) |
| <b>Knowledge</b>          | 0-11  | 248 | 7.50                               | 7.58   | 8.19   | 7.53                                | 8.12   | 8.45   | -0.04                | 0.51 <sup>a</sup>        | 0.25                     |
|                           |       |     | (1.33)                             | (1.12) | (1.15) | (1.34)                              | (1.30) | (1.37) |                      | P=0.04                   | P=0.30                   |
| <b>Anxiety</b>            | 0-18  | 248 | 6.31                               | 6.04   | 6.52   | 6.09                                | 5.90   | 6.47   | -0.07                | 0.04                     | 0.05                     |
|                           |       |     | (4.48)                             | (4.49) | (4.53) | (3.99)                              | (4.07) | (3.94) |                      | P=0.94                   | P=0.94                   |
| <b>Thoughts</b>           |       |     |                                    |        |        |                                     |        |        |                      |                          |                          |
| <b>Negative</b>           | 0-40  | 248 | 12.56                              | 11.12  | 10.95  | 11.68                               | 10.07  | 9.95   | -1.39                | -0.27                    | -0.18                    |
|                           |       |     | (8.68)                             | (8.36) | (8.82) | (7.92)                              | (7.31) | (7.09) |                      | P=0.82                   | P=0.87                   |
| <b>Positive</b>           | 0-40  | 248 | 22.49                              | 21.27  | 22.89  | 23.26                               | 24.72  | 23.78  | 0.22                 | 3.32 <sup>aa</sup>       | 0.45                     |
|                           |       |     | (8.33)                             | (7.68) | (8.52) | (8.26)                              | (6.95) | (7.08) |                      | P=0.007                  | P=0.73                   |
| <b>Perspective-taking</b> | 0-24  | 245 | 16.37                              | 16.02  | 16.15  | 16.78                               | 17.04  | 17.01  | -0.33                | 0.51                     | 0.32                     |
|                           |       |     | (5.50)                             | (4.60) | (4.48) | (5.29)                              | (4.44) | (4.18) |                      | P=0.51                   | P=0.73                   |
| <b>Self-esteem</b>        | 10-40 | 245 | 27.86                              | 27.88  | 29.32  | 29.22                               | 29.71  | 29.49  | 1.10                 | 0.52                     | -1.11                    |
|                           |       |     | (5.26)                             | (5.15) | (6.07) | (4.58)                              | (4.82) | (5.07) |                      | P=0.47                   | P=0.17                   |

<sup>a</sup>p < .05; <sup>aa</sup>p < .01; <sup>aaa</sup>p < .001
